# Supplementary material
Source: PubMed Central journal article supplement (PMC4363404)
Supplement: IAI.02619-14_zii999091132so1.pdf [file IAI.02619-14_zii999091132so1.pdf]

## Supplementary Figure 1

### **IL-1R deficiency causes decreased inflammatory cell recruitment to the lung.**

Infected lungs 5 dpi were dissociated into single cell suspensions and analyzed via flow cytometry to determine numbers of specific cell populations. A) CD45<sup>+</sup> cell counts. B) Alveolar macrophage cell count as defined by CD11c<sup>+</sup>, SiglecF<sup>+</sup>, autofluorescent cells. C) Dendritic cell count as defined by CD11c<sup>+</sup>, CD11b<sup>+</sup>, MHC Class II<sup>high</sup> cells. D) Monocyte cell count as defined by CD11c<sup>-</sup>, CD11b<sup>+</sup>, side-scatter low, Gr-1<sup>+</sup> cells. E) Neutrophil cell count as defined by CD11c<sup>-</sup>, CD11b<sup>+</sup>, side-scatter high, Gr-1<sup>+</sup> cells.

\* $p < 0.01$ ,  $p$  values were determined using ANOVA analysis.

## Supplementary Figure 2

**Representative FACS plot of CD4<sup>+</sup> T cells that are CD69 positive.** Lung cells were dissociated and stained with appropriate antibodies. This plot shows CD4<sup>+</sup> cells that are CD69<sup>+</sup>. Similar gating strategies were used to define CD69<sup>+</sup> populations on CD8<sup>+</sup> T cells,  $\gamma\delta$  TCR<sup>+</sup> cells and NK cells.

## Supplementary Figure 3

**IL-1R deficiency does not affect cytokine signaling in bone marrow derived dendritic cells *in vitro*.** Bone-marrow derived dendritic cells from C57Bl/6J and IL-1R<sup>-/-</sup> mice were harvested and infected *in vitro* with *Histoplasma* at an MOI of 1.

Supernatants from infected cells were collected in triplicate at 48 hours post-infection and evaluated for cytokine levels. Significance was determined by ANOVA analysis.

## Supplementary Figure 4

**In the absence of T cells, *Histoplasma* grows similarly in wild-type and MyD88<sup>-/-</sup> BMDCs.** BMDCs were infected with wild-type *Histoplasma* (MOI=1). Cells were lysed and CFUs counted at the indicated timepoints. Timepoints are the mean +SD of three independent samples. All results are representative of at least three independent experiments.
