# Supplementary material
Source: PubMed Central journal article supplement (PMC4363404)
Supplement: IAI.02619-14_zii999091132so2.pdf [file IAI.02619-14_zii999091132so2.pdf]

## Supplementary Figure 1.

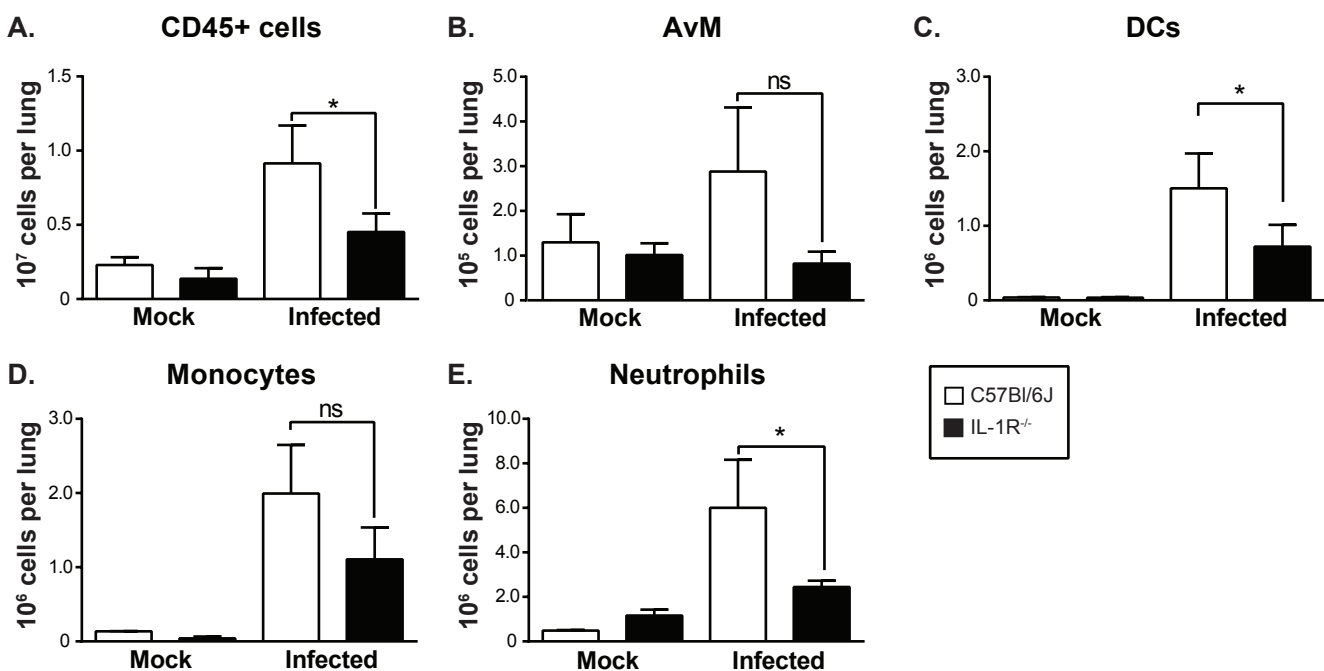

**Supplementary Figure 1. IL-1R deficiency causes decreased inflammatory cell recruitment to the lung.** Infected lungs 5 dpi were dissociated into single cell suspensions and analyzed via flow cytometry to determine numbers of specific cell populations. A) CD45+ cell counts. B) Alveolar macrophage cell count as defined by CD11c+, SiglecF+, autofluorescent cells. C) Dendritic cell count as defined by CD11c+, CD11b+, MHC Class II<sup>high</sup> cells. D) Monocyte cell count as defined by CD11c-, CD11b+, side-scatter low, Gr-1+ cells. E) Neutrophil cell count as defined by CD11c-, CD11b+, side-scatter high, Gr-1+ cells. \* $p < 0.01$ ,  $p$  values were determined using ANOVA analysis.
