# Supplementary material
Source: PubMed Central journal article supplement (PMC4363404)
Supplement: IAI.02619-14_zii999091132so3.pdf [file IAI.02619-14_zii999091132so3.pdf]

## Supplementary Figure 2.

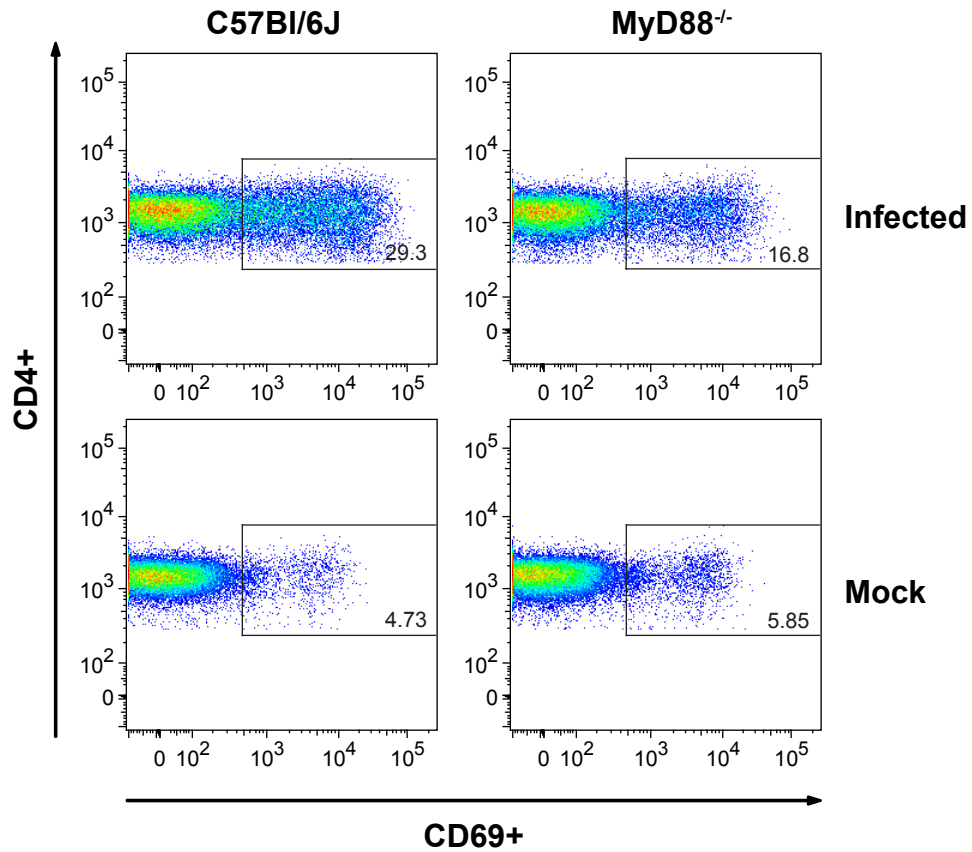

**Supplementary Figure 2. Representative FACS plot of CD69-positive CD4+ T cells .** Lung cells were dissociated and stained with appropriate antibodies. This plot shows CD4+ cells that are CD69+. Similar gating strategies were used to define CD69+ populations on CD8+ T cells,  $\gamma\delta$  TCR+ cells and NK cells.
