# Supplementary material
Source: PubMed Central journal article supplement (PMC4363404)
Supplement: IAI.02619-14_zii999091132so4.pdf [file IAI.02619-14_zii999091132so4.pdf]

### Supplementary Figure 3.

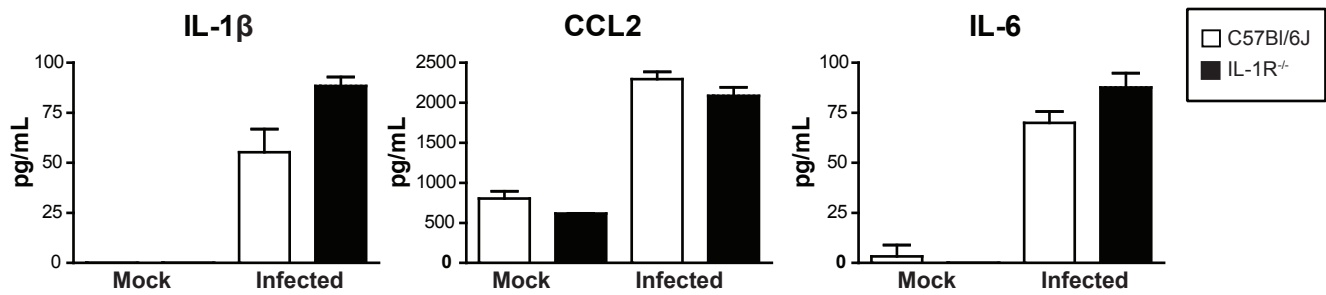

**Supplementary Figure 3. IL-1R deficiency does not affect cytokine signaling in bone marrow derived dendritic cells *in vitro*.** Bone-marrow derived dendritic cells from C57Bl/6J and IL-1R<sup>-/-</sup> mice were harvested and infected *in vitro* with *Histoplasma* at an MOI of 1. Supernatants from infected cells were collected in triplicate at 48 hours post-infection and evaluated for cytokine levels. Significance determined using ANOVA analysis.
