# Supplementary material
Source: PubMed Central journal article supplement (PMC4363404)
Supplement: IAI.02619-14_zii999091132so5.pdf [file IAI.02619-14_zii999091132so5.pdf]

## Supplementary Figure 4

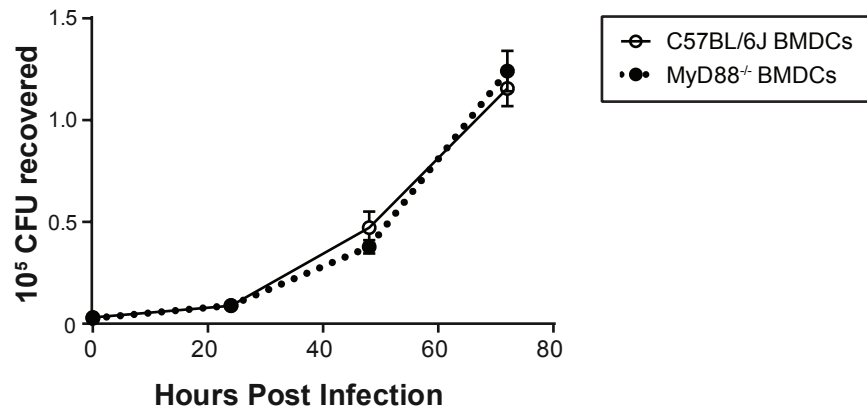

**Supplementary Figure 4: In the absence of T cells, *Histoplasma* grows similarly in wild-type and MyD88<sup>-/-</sup> BMDCs.** BMDCs were infected with wild-type *Histoplasma* (MOI=1). Cells were lysed and CFUs counted at the indicated timepoints. Timepoints are the mean +SD of three independent samples. All results are representative of at least three independent experiments.
